# Supplementary material for: Comparison of the audiological knowledge of three chatbots – ChatGPT, Bing Chat, and Bard
Source: bioRxiv or medRxiv preprint supplement (doi:10.1101/2023.11.22.23298893), 2023-11-22
Supplement: Supplementary file [file media-4.pdf]

Supplementary Table 1. Scores given to chatbot responses.

| question no. | ChatGPT | BingChat | Bard |
|--------------|---------|----------|------|
| 1            | 4       | 4        | 3    |
| 2            | 3       | 4        | 4    |
| 3            | 4       | 3        | 1    |
| 4            | 5       | 3        | 3    |
| 5            | 5       | 4        | 4    |
| 6            | 5       | 5        | 4    |
| 7            | 5       | 4        | 5    |
| 8            | 4       | 3        | 5    |
| 9            | 5       | 4        | 5    |
| 10           | 5       | 3        | 2    |
| sum          | 45      | 37       | 36   |

Supplementary Table 2. Number of detected errors in each response.

| question no. | ChatGPT | BingChat | Bard |
|--------------|---------|----------|------|
| 1            | 0       | 0        | 1    |
| 2            | 1       | 0        | 0    |
| 3            | 0       | 1        | 0    |
| 4            | 0       | 0        | 0    |
| 5            | 0       | 0        | 0    |
| 6            | 0       | 0        | 0    |
| 7            | 0       | 0        | 0    |
| 8            | 1       | 0        | 0    |
| 9            | 0       | 0        | 0    |
| 10           | 0       | 0        | 5    |
| sum          | 2       | 1        | 6    |

Supplementary Table 3. Number of detected inaccuracies in each response.

| question no. | ChatGPT | BingChat | Bard |
|--------------|---------|----------|------|
| 1            | 1       | 1        | 1    |
| 2            | 0       | 0        | 0    |
| 3            | 2       | 1        | 0    |
| 4            | 0       | 1        | 1    |
| 5            | 0       | 0        | 0    |
| 6            | 0       | 0        | 0    |
| 7            | 0       | 0        | 0    |
| 8            | 1       | 0        | 0    |
| 9            | 0       | 0        | 0    |
| 10           | 0       | 1        | 0    |
| sum          | 4       | 4        | 2    |

Supplementary Table 4. Does the response cited the source (yes – 1, no – 0).

| question no. | ChatGPT | BingChat | Bard |
|--------------|---------|----------|------|
| 1            | 0       | 1        | 1    |
| 2            | 0       | 1        | 1    |
| 3            | 0       | 1        | 0    |
| 4            | 0       | 0        | 0    |
| 5            | 0       | 1        | 0    |
| 6            | 0       | 1        | 0    |
| 7            | 0       | 1        | 0    |
| 8            | 0       | 1        | 0    |
| 9            | 0       | 0        | 0    |
| 10           | 0       | 1        | 0    |
| sum          | 0       | 8        | 2    |

Supplementary Table 5. Does the response suggested consulting a specialist (yes – 1, no – 0).

| question no. | ChatGPT | BingChat | Bard |
|--------------|---------|----------|------|
| 1            | 0       | 0        | 1    |
| 2            | 0       | 0        | 1    |
| 3            | 0       | 0        | 0    |
| 4            | 0       | 0        | 1    |
| 5            | 1       | 0        | 1    |
| 6            | 0       | 0        | 1    |
| 7            | 1       | 0        | 1    |
| 8            | 1       | 1        | 1    |
| 9            | 0       | 0        | 1    |
| 10           | 1       | 0        | 1    |
| sum          | 4       | 1        | 9    |

Supplementary Table 6. Number of words in a response.

| question no. | ChatGPT | BingChat | Bard  |
|--------------|---------|----------|-------|
| 1            | 534     | 160      | 358   |
| 2            | 464     | 107      | 382   |
| 3            | 418     | 175      | -     |
| 4            | 494     | 69       | 366   |
| 5            | 515     | 169      | 355   |
| 6            | 388     | 145      | 255   |
| 7            | 482     | 72       | 383   |
| 8            | 450     | 86       | 335   |
| 9            | 535     | 54       | 405   |
| 10           | 443     | 88       | 399   |
| mean         | 472.3   | 112.5    | 359.8 |
| std          | 49.0    | 45.6     | 45.1  |
